# Supplementary material
Source: Research Square preprint supplement (doi:10.21203/rs.3.rs-8927130/v1)

# Supplements

Reduced locus-coeruleus phasic activity reflects attenuated selectivity during visual sensory processing in autism

2026-02-20

## Contents

|                                                                      |           |
|----------------------------------------------------------------------|-----------|
| <b>Abbreviations</b>                                                 | <b>2</b>  |
| <b>Covariate Models</b>                                              | <b>3</b>  |
| Supplement 1: Covariate Model: SEPR . . . . .                        | 3         |
| Supplement 2: Covariate Model: BPS . . . . .                         | 3         |
| Supplement 3: Covariate Model: P3 amplitude . . . . .                | 4         |
| Supplement 4: Covariate Model: P3 latency . . . . .                  | 4         |
| Supplement 5: Covariate Model: MMN amplitude . . . . .               | 5         |
| Supplement 6: Covariate Model: MMN latency . . . . .                 | 5         |
| <b>Main Models on Condition Level</b>                                | <b>6</b>  |
| Supplement 7: Main Model: SEPR . . . . .                             | 6         |
| Supplement 8: Main Model: BPS . . . . .                              | 6         |
| Supplement 9: Main Model: P3 amplitude . . . . .                     | 7         |
| Supplement 10: Main Model: P3 latency . . . . .                      | 7         |
| Supplement 11: Main Model: MMN amplitude . . . . .                   | 8         |
| Supplement 12: Main Model: MMN latency . . . . .                     | 8         |
| Supplement 13: MMN difference wave amplitude . . . . .               | 9         |
| Supplement 14: MMN difference wave latency . . . . .                 | 9         |
| Supplement 15: SEPR on RT . . . . .                                  | 10        |
| Supplement 16: BPS on RT . . . . .                                   | 10        |
| Supplement 17: P3 amplitude on RT . . . . .                          | 11        |
| Supplement 18: P3 latency on RT . . . . .                            | 11        |
| Supplement 19: MMN amplitude on RT . . . . .                         | 12        |
| Supplement 20: MMN latency on RT . . . . .                           | 12        |
| Supplement 21: Manipulations on RT . . . . .                         | 13        |
| <b>Main Models on Trial Level</b>                                    | <b>13</b> |
| Supplement 22: Main Model: SEPR . . . . .                            | 13        |
| Supplement 23: Main Model: BPS . . . . .                             | 14        |
| Supplement 24: Main Model: P3 amplitude . . . . .                    | 14        |
| Supplement 25: Main Model: P3 latency . . . . .                      | 15        |
| Supplement 26: SEPR on RT . . . . .                                  | 15        |
| Supplement 27: BPS on RT . . . . .                                   | 16        |
| Supplement 28: P3 amplitude on RT . . . . .                          | 16        |
| Supplement 29: P3 latency on RT . . . . .                            | 17        |
| Supplement 30: Manipulations on RT . . . . .                         | 17        |
| Supplement 31: Associations between pupillometric measures . . . . . | 18        |
| Supplement 32: Associations between SEPR and P3 amplitude . . . . .  | 19        |

|                                                                   |           |
|-------------------------------------------------------------------|-----------|
| <b>Miscellaneous</b>                                              | <b>20</b> |
| Supplement 33: Power simulation . . . . .                         | 20        |
| Supplement 34: Data exclusion process . . . . .                   | 21        |
| Supplement 35: BPS defined as 50 ms . . . . .                     | 21        |
| Supplement 36: BPS defined as 500 ms . . . . .                    | 22        |
| Supplement 37: BPS-SEPR Model Fit . . . . .                       | 22        |
| Supplement 38: Quadratic association between BPS and RT . . . . . | 23        |
| Supplement 39: MMN Topographies . . . . .                         | 23        |

## Abbreviations

**SEPR** = stimulus-evoked pupillary response  
**BPS** = baseline pupil size  
**MMN** = mismatch negativity  
**ASD** = autism spectrum disorder group  
**CON** = control group  
**MHC** = mental health conditions group  
**RT** = reaction time

## Covariate Models

### Supplement 1: Covariate Model: SEPR

|                                               | Sum Sq | Mean Sq | NumDF | DenDF | F value | Pr(>F) |
|-----------------------------------------------|--------|---------|-------|-------|---------|--------|
| stimulus                                      | 651.60 | 651.60  | 1     | 889   | 3131.93 | 0.000  |
| group                                         | 0.36   | 0.18    | 2     | 123   | 0.86    | 0.425  |
| stimulus_salience                             | 8.63   | 8.63    | 1     | 889   | 41.49   | 0.000  |
| task_utility                                  | 1.15   | 1.15    | 1     | 889   | 5.51    | 0.019  |
| age                                           | 0.01   | 0.01    | 1     | 123   | 0.05    | 0.825  |
| gender                                        | 0.30   | 0.30    | 1     | 123   | 1.44    | 0.232  |
| iq_verbal_estimate                            | 0.36   | 0.36    | 1     | 123   | 1.73    | 0.190  |
| iq_nonverbal_estimate                         | 0.01   | 0.01    | 1     | 123   | 0.03    | 0.852  |
| stimulus:group                                | 6.38   | 3.19    | 2     | 889   | 15.33   | 0.000  |
| stimulus:stimulus_salience                    | 21.35  | 21.35   | 1     | 889   | 102.61  | 0.000  |
| group:stimulus_salience                       | 0.35   | 0.17    | 2     | 889   | 0.83    | 0.435  |
| stimulus:task_utility                         | 3.78   | 3.78    | 1     | 889   | 18.17   | 0.000  |
| group:task_utility                            | 0.54   | 0.27    | 2     | 889   | 1.30    | 0.273  |
| stimulus_salience:task_utility                | 0.04   | 0.04    | 1     | 889   | 0.20    | 0.653  |
| stimulus:group:stimulus_salience              | 0.38   | 0.19    | 2     | 889   | 0.91    | 0.402  |
| stimulus:group:task_utility                   | 0.70   | 0.35    | 2     | 889   | 1.69    | 0.185  |
| stimulus:stimulus_salience:task_utility       | 0.07   | 0.07    | 1     | 889   | 0.34    | 0.562  |
| group:stimulus_salience:task_utility          | 0.00   | 0.00    | 2     | 889   | 0.01    | 0.995  |
| stimulus:group:stimulus_salience:task_utility | 0.02   | 0.01    | 2     | 889   | 0.05    | 0.954  |

### Supplement 2: Covariate Model: BPS

|                                               | Sum Sq | Mean Sq | NumDF | DenDF | F value | Pr(>F) |
|-----------------------------------------------|--------|---------|-------|-------|---------|--------|
| stimulus                                      | 0.83   | 0.83    | 1     | 889   | 13.30   | 0.000  |
| group                                         | 0.07   | 0.03    | 2     | 123   | 0.56    | 0.574  |
| stimulus_salience                             | 45.76  | 45.76   | 1     | 889   | 731.85  | 0.000  |
| task_utility                                  | 0.01   | 0.01    | 1     | 889   | 0.11    | 0.738  |
| age                                           | 0.44   | 0.44    | 1     | 123   | 7.02    | 0.009  |
| gender                                        | 0.14   | 0.14    | 1     | 123   | 2.24    | 0.137  |
| iq_verbal_estimate                            | 0.02   | 0.02    | 1     | 123   | 0.26    | 0.610  |
| iq_nonverbal_estimate                         | 0.08   | 0.08    | 1     | 123   | 1.22    | 0.271  |
| stimulus:group                                | 0.00   | 0.00    | 2     | 889   | 0.02    | 0.984  |
| stimulus:stimulus_salience                    | 0.18   | 0.18    | 1     | 889   | 2.86    | 0.091  |
| group:stimulus_salience                       | 1.36   | 0.68    | 2     | 889   | 10.91   | 0.000  |
| stimulus:task_utility                         | 0.00   | 0.00    | 1     | 889   | 0.05    | 0.827  |
| group:task_utility                            | 0.36   | 0.18    | 2     | 889   | 2.84    | 0.059  |
| stimulus_salience:task_utility                | 0.15   | 0.15    | 1     | 889   | 2.47    | 0.117  |
| stimulus:group:stimulus_salience              | 0.03   | 0.02    | 2     | 889   | 0.26    | 0.774  |
| stimulus:group:task_utility                   | 0.00   | 0.00    | 2     | 889   | 0.02    | 0.982  |
| stimulus:stimulus_salience:task_utility       | 0.00   | 0.00    | 1     | 889   | 0.02    | 0.897  |
| group:stimulus_salience:task_utility          | 0.16   | 0.08    | 2     | 889   | 1.30    | 0.273  |
| stimulus:group:stimulus_salience:task_utility | 0.00   | 0.00    | 2     | 889   | 0.04    | 0.965  |

### Supplement 3: Covariate Model: P3 amplitude

|                                               | Sum Sq | Mean Sq | NumDF | DenDF | F value | Pr(>F) |
|-----------------------------------------------|--------|---------|-------|-------|---------|--------|
| stimulus                                      | 95.38  | 95.38   | 1     | 798   | 371.42  | 0.000  |
| group                                         | 0.86   | 0.43    | 2     | 110   | 1.67    | 0.194  |
| stimulus_salience                             | 7.70   | 7.70    | 1     | 798   | 30.00   | 0.000  |
| task_utility                                  | 9.88   | 9.88    | 1     | 798   | 38.47   | 0.000  |
| age                                           | 0.60   | 0.60    | 1     | 110   | 2.35    | 0.128  |
| gender                                        | 0.20   | 0.20    | 1     | 110   | 0.78    | 0.380  |
| iq_verbal_estimate                            | 0.46   | 0.46    | 1     | 110   | 1.78    | 0.185  |
| iq_nonverbal_estimate                         | 0.34   | 0.34    | 1     | 110   | 1.32    | 0.254  |
| stimulus:group                                | 2.21   | 1.10    | 2     | 798   | 4.30    | 0.014  |
| stimulus:stimulus_salience                    | 5.65   | 5.65    | 1     | 798   | 22.02   | 0.000  |
| group:stimulus_salience                       | 0.76   | 0.38    | 2     | 798   | 1.48    | 0.229  |
| stimulus:task_utility                         | 4.09   | 4.09    | 1     | 798   | 15.93   | 0.000  |
| group:task_utility                            | 0.85   | 0.42    | 2     | 798   | 1.65    | 0.192  |
| stimulus_salience:task_utility                | 0.29   | 0.29    | 1     | 798   | 1.12    | 0.290  |
| stimulus:group:stimulus_salience              | 1.50   | 0.75    | 2     | 798   | 2.92    | 0.054  |
| stimulus:group:task_utility                   | 0.59   | 0.30    | 2     | 798   | 1.15    | 0.317  |
| stimulus:stimulus_salience:task_utility       | 0.00   | 0.00    | 1     | 798   | 0.00    | 0.960  |
| group:stimulus_salience:task_utility          | 0.86   | 0.43    | 2     | 798   | 1.68    | 0.188  |
| stimulus:group:stimulus_salience:task_utility | 0.71   | 0.36    | 2     | 798   | 1.39    | 0.250  |

### Supplement 4: Covariate Model: P3 latency

|                                               | Sum Sq | Mean Sq | NumDF | DenDF | F value | Pr(>F) |
|-----------------------------------------------|--------|---------|-------|-------|---------|--------|
| stimulus                                      | 53.75  | 53.75   | 1     | 798   | 103.17  | 0.000  |
| group                                         | 0.78   | 0.39    | 2     | 110   | 0.75    | 0.477  |
| stimulus_salience                             | 0.19   | 0.19    | 1     | 798   | 0.37    | 0.545  |
| task_utility                                  | 3.01   | 3.01    | 1     | 798   | 5.78    | 0.016  |
| age                                           | 0.15   | 0.15    | 1     | 110   | 0.28    | 0.596  |
| gender                                        | 0.36   | 0.36    | 1     | 110   | 0.70    | 0.406  |
| iq_verbal_estimate                            | 0.87   | 0.87    | 1     | 110   | 1.68    | 0.198  |
| iq_nonverbal_estimate                         | 0.27   | 0.27    | 1     | 110   | 0.52    | 0.471  |
| stimulus:group                                | 0.25   | 0.12    | 2     | 798   | 0.24    | 0.790  |
| stimulus:stimulus_salience                    | 9.97   | 9.97    | 1     | 798   | 19.15   | 0.000  |
| group:stimulus_salience                       | 0.65   | 0.32    | 2     | 798   | 0.62    | 0.537  |
| stimulus:task_utility                         | 0.21   | 0.21    | 1     | 798   | 0.40    | 0.525  |
| group:task_utility                            | 2.78   | 1.39    | 2     | 798   | 2.67    | 0.070  |
| stimulus_salience:task_utility                | 1.94   | 1.94    | 1     | 798   | 3.73    | 0.054  |
| stimulus:group:stimulus_salience              | 1.51   | 0.76    | 2     | 798   | 1.45    | 0.235  |
| stimulus:group:task_utility                   | 1.03   | 0.51    | 2     | 798   | 0.99    | 0.374  |
| stimulus:stimulus_salience:task_utility       | 0.59   | 0.59    | 1     | 798   | 1.14    | 0.286  |
| group:stimulus_salience:task_utility          | 2.02   | 1.01    | 2     | 798   | 1.94    | 0.145  |
| stimulus:group:stimulus_salience:task_utility | 0.30   | 0.15    | 2     | 798   | 0.29    | 0.748  |

### Supplement 5: Covariate Model: MMN amplitude

|                                               | Sum Sq | Mean Sq | NumDF | DenDF | F value | Pr(>F) |
|-----------------------------------------------|--------|---------|-------|-------|---------|--------|
| stimulus                                      | 9.82   | 9.82    | 1     | 798   | 32.70   | 0.000  |
| group                                         | 1.14   | 0.57    | 2     | 110   | 1.90    | 0.155  |
| stimulus_salience                             | 0.10   | 0.10    | 1     | 798   | 0.32    | 0.571  |
| task_utility                                  | 0.39   | 0.39    | 1     | 798   | 1.30    | 0.254  |
| age                                           | 1.77   | 1.77    | 1     | 110   | 5.91    | 0.017  |
| gender                                        | 0.00   | 0.00    | 1     | 110   | 0.00    | 0.999  |
| iq_verbal_estimate                            | 0.31   | 0.31    | 1     | 110   | 1.03    | 0.313  |
| iq_nonverbal_estimate                         | 0.01   | 0.01    | 1     | 110   | 0.03    | 0.852  |
| stimulus:group                                | 0.90   | 0.45    | 2     | 798   | 1.50    | 0.224  |
| stimulus:stimulus_salience                    | 0.63   | 0.63    | 1     | 798   | 2.10    | 0.147  |
| group:stimulus_salience                       | 0.52   | 0.26    | 2     | 798   | 0.87    | 0.420  |
| stimulus:task_utility                         | 0.89   | 0.89    | 1     | 798   | 2.98    | 0.085  |
| group:task_utility                            | 0.38   | 0.19    | 2     | 798   | 0.63    | 0.534  |
| stimulus_salience:task_utility                | 1.35   | 1.35    | 1     | 798   | 4.48    | 0.035  |
| stimulus:group:stimulus_salience              | 0.31   | 0.16    | 2     | 798   | 0.52    | 0.595  |
| stimulus:group:task_utility                   | 0.52   | 0.26    | 2     | 798   | 0.86    | 0.424  |
| stimulus:stimulus_salience:task_utility       | 0.87   | 0.87    | 1     | 798   | 2.91    | 0.088  |
| group:stimulus_salience:task_utility          | 0.51   | 0.25    | 2     | 798   | 0.84    | 0.430  |
| stimulus:group:stimulus_salience:task_utility | 0.47   | 0.24    | 2     | 798   | 0.79    | 0.456  |

### Supplement 6: Covariate Model: MMN latency

|                                               | Sum Sq | Mean Sq | NumDF | DenDF | F value | Pr(>F) |
|-----------------------------------------------|--------|---------|-------|-------|---------|--------|
| stimulus                                      | 0.27   | 0.27    | 1     | 798   | 0.48    | 0.490  |
| group                                         | 0.21   | 0.11    | 2     | 110   | 0.19    | 0.829  |
| stimulus_salience                             | 6.40   | 6.40    | 1     | 798   | 11.26   | 0.001  |
| task_utility                                  | 0.10   | 0.10    | 1     | 798   | 0.17    | 0.682  |
| age                                           | 0.59   | 0.59    | 1     | 110   | 1.03    | 0.312  |
| gender                                        | 0.09   | 0.09    | 1     | 110   | 0.15    | 0.695  |
| iq_verbal_estimate                            | 0.02   | 0.02    | 1     | 110   | 0.04    | 0.849  |
| iq_nonverbal_estimate                         | 0.17   | 0.17    | 1     | 110   | 0.29    | 0.589  |
| stimulus:group                                | 0.13   | 0.06    | 2     | 798   | 0.11    | 0.893  |
| stimulus:stimulus_salience                    | 0.54   | 0.54    | 1     | 798   | 0.96    | 0.328  |
| group:stimulus_salience                       | 0.10   | 0.05    | 2     | 798   | 0.09    | 0.912  |
| stimulus:task_utility                         | 1.50   | 1.50    | 1     | 798   | 2.64    | 0.104  |
| group:task_utility                            | 1.27   | 0.64    | 2     | 798   | 1.12    | 0.327  |
| stimulus_salience:task_utility                | 6.10   | 6.10    | 1     | 798   | 10.73   | 0.001  |
| stimulus:group:stimulus_salience              | 0.49   | 0.25    | 2     | 798   | 0.43    | 0.649  |
| stimulus:group:task_utility                   | 0.41   | 0.21    | 2     | 798   | 0.36    | 0.696  |
| stimulus:stimulus_salience:task_utility       | 0.68   | 0.68    | 1     | 798   | 1.19    | 0.275  |
| group:stimulus_salience:task_utility          | 0.78   | 0.39    | 2     | 798   | 0.68    | 0.506  |
| stimulus:group:stimulus_salience:task_utility | 0.20   | 0.10    | 2     | 798   | 0.18    | 0.835  |

## Main Models on Condition Level

### Supplement 7: Main Model: SEPR

|                                               | Sum Sq | Mean Sq | NumDF | DenDF | F value | Pr(>F) |
|-----------------------------------------------|--------|---------|-------|-------|---------|--------|
| stimulus                                      | 726.13 | 726.13  | 1     | 980   | 3582.12 | 0.000  |
| group                                         | 1.14   | 0.57    | 2     | 138   | 2.81    | 0.064  |
| stimulus_salience                             | 8.58   | 8.58    | 1     | 980   | 42.31   | 0.000  |
| task_utility                                  | 1.42   | 1.42    | 1     | 980   | 6.98    | 0.008  |
| age                                           | 0.02   | 0.02    | 1     | 138   | 0.09    | 0.759  |
| gender                                        | 0.29   | 0.29    | 1     | 138   | 1.44    | 0.232  |
| stimulus:group                                | 8.12   | 4.06    | 2     | 980   | 20.02   | 0.000  |
| stimulus:stimulus_salience                    | 22.86  | 22.86   | 1     | 980   | 112.78  | 0.000  |
| group:stimulus_salience                       | 0.28   | 0.14    | 2     | 980   | 0.70    | 0.499  |
| stimulus:task_utility                         | 4.44   | 4.44    | 1     | 980   | 21.92   | 0.000  |
| group:task_utility                            | 0.48   | 0.24    | 2     | 980   | 1.19    | 0.304  |
| stimulus_salience:task_utility                | 0.00   | 0.00    | 1     | 980   | 0.01    | 0.904  |
| stimulus:group:stimulus_salience              | 0.55   | 0.28    | 2     | 980   | 1.36    | 0.256  |
| stimulus:group:task_utility                   | 0.72   | 0.36    | 2     | 980   | 1.77    | 0.170  |
| stimulus:stimulus_salience:task_utility       | 0.02   | 0.02    | 1     | 980   | 0.08    | 0.771  |
| group:stimulus_salience:task_utility          | 0.01   | 0.00    | 2     | 980   | 0.02    | 0.985  |
| stimulus:group:stimulus_salience:task_utility | 0.03   | 0.01    | 2     | 980   | 0.07    | 0.936  |

### Supplement 8: Main Model: BPS

|                                               | Sum Sq | Mean Sq | NumDF | DenDF | F value | Pr(>F) |
|-----------------------------------------------|--------|---------|-------|-------|---------|--------|
| stimulus                                      | 0.95   | 0.95    | 1     | 980   | 15.51   | 0.000  |
| group                                         | 0.13   | 0.06    | 2     | 138   | 1.03    | 0.360  |
| stimulus_salience                             | 46.95  | 46.95   | 1     | 980   | 764.85  | 0.000  |
| task_utility                                  | 0.04   | 0.04    | 1     | 980   | 0.63    | 0.429  |
| age                                           | 0.60   | 0.60    | 1     | 138   | 9.75    | 0.002  |
| gender                                        | 0.13   | 0.13    | 1     | 138   | 2.09    | 0.151  |
| stimulus:group                                | 0.00   | 0.00    | 2     | 980   | 0.04    | 0.964  |
| stimulus:stimulus_salience                    | 0.21   | 0.21    | 1     | 980   | 3.38    | 0.066  |
| group:stimulus_salience                       | 1.56   | 0.78    | 2     | 980   | 12.71   | 0.000  |
| stimulus:task_utility                         | 0.00   | 0.00    | 1     | 980   | 0.04    | 0.848  |
| group:task_utility                            | 0.28   | 0.14    | 2     | 980   | 2.29    | 0.102  |
| stimulus_salience:task_utility                | 0.16   | 0.16    | 1     | 980   | 2.65    | 0.104  |
| stimulus:group:stimulus_salience              | 0.05   | 0.02    | 2     | 980   | 0.39    | 0.678  |
| stimulus:group:task_utility                   | 0.00   | 0.00    | 2     | 980   | 0.03    | 0.968  |
| stimulus:stimulus_salience:task_utility       | 0.00   | 0.00    | 1     | 980   | 0.04    | 0.844  |
| group:stimulus_salience:task_utility          | 0.25   | 0.12    | 2     | 980   | 2.02    | 0.133  |
| stimulus:group:stimulus_salience:task_utility | 0.00   | 0.00    | 2     | 980   | 0.03    | 0.966  |

## Supplement 9: Main Model: P3 amplitude

|                                               | Sum Sq | Mean Sq | NumDF | DenDF | F value | Pr(>F) |
|-----------------------------------------------|--------|---------|-------|-------|---------|--------|
| stimulus                                      | 106.42 | 106.42  | 1     | 889   | 429.53  | 0.000  |
| group                                         | 2.30   | 1.15    | 2     | 125   | 4.65    | 0.011  |
| stimulus_salience                             | 8.56   | 8.56    | 1     | 889   | 34.54   | 0.000  |
| task_utility                                  | 10.74  | 10.74   | 1     | 889   | 43.37   | 0.000  |
| age                                           | 1.30   | 1.30    | 1     | 125   | 5.24    | 0.024  |
| gender                                        | 0.14   | 0.14    | 1     | 125   | 0.58    | 0.448  |
| stimulus:group                                | 2.99   | 1.49    | 2     | 889   | 6.03    | 0.003  |
| stimulus:stimulus_salience                    | 6.77   | 6.77    | 1     | 889   | 27.33   | 0.000  |
| group:stimulus_salience                       | 0.71   | 0.35    | 2     | 889   | 1.43    | 0.241  |
| stimulus:task_utility                         | 4.36   | 4.36    | 1     | 889   | 17.61   | 0.000  |
| group:task_utility                            | 0.66   | 0.33    | 2     | 889   | 1.34    | 0.262  |
| stimulus_salience:task_utility                | 0.19   | 0.19    | 1     | 889   | 0.77    | 0.381  |
| stimulus:group:stimulus_salience              | 1.51   | 0.75    | 2     | 889   | 3.04    | 0.048  |
| stimulus:group:task_utility                   | 0.29   | 0.15    | 2     | 889   | 0.59    | 0.557  |
| stimulus:stimulus_salience:task_utility       | 0.00   | 0.00    | 1     | 889   | 0.00    | 0.996  |
| group:stimulus_salience:task_utility          | 1.14   | 0.57    | 2     | 889   | 2.31    | 0.100  |
| stimulus:group:stimulus_salience:task_utility | 0.63   | 0.32    | 2     | 889   | 1.28    | 0.279  |

## Supplement 10: Main Model: P3 latency

|                                               | Sum Sq | Mean Sq | NumDF | DenDF | F value | Pr(>F) |
|-----------------------------------------------|--------|---------|-------|-------|---------|--------|
| stimulus                                      | 54.31  | 54.31   | 1     | 889   | 100.21  | 0.000  |
| group                                         | 1.80   | 0.90    | 2     | 125   | 1.66    | 0.195  |
| stimulus_salience                             | 0.31   | 0.31    | 1     | 889   | 0.58    | 0.447  |
| task_utility                                  | 4.91   | 4.91    | 1     | 889   | 9.06    | 0.003  |
| age                                           | 0.20   | 0.20    | 1     | 125   | 0.37    | 0.546  |
| gender                                        | 0.60   | 0.60    | 1     | 125   | 1.11    | 0.293  |
| stimulus:group                                | 0.68   | 0.34    | 2     | 889   | 0.63    | 0.535  |
| stimulus:stimulus_salience                    | 10.51  | 10.51   | 1     | 889   | 19.39   | 0.000  |
| group:stimulus_salience                       | 0.19   | 0.10    | 2     | 889   | 0.18    | 0.839  |
| stimulus:task_utility                         | 0.12   | 0.12    | 1     | 889   | 0.22    | 0.643  |
| group:task_utility                            | 3.32   | 1.66    | 2     | 889   | 3.07    | 0.047  |
| stimulus_salience:task_utility                | 0.93   | 0.93    | 1     | 889   | 1.72    | 0.190  |
| stimulus:group:stimulus_salience              | 1.45   | 0.73    | 2     | 889   | 1.34    | 0.262  |
| stimulus:group:task_utility                   | 0.86   | 0.43    | 2     | 889   | 0.79    | 0.452  |
| stimulus:stimulus_salience:task_utility       | 0.95   | 0.95    | 1     | 889   | 1.75    | 0.187  |
| group:stimulus_salience:task_utility          | 1.87   | 0.94    | 2     | 889   | 1.73    | 0.178  |
| stimulus:group:stimulus_salience:task_utility | 0.12   | 0.06    | 2     | 889   | 0.11    | 0.898  |

## Supplement 11: Main Model: MMN amplitude

|                                               | Sum Sq | Mean Sq | NumDF | DenDF | F value | Pr(>F) |
|-----------------------------------------------|--------|---------|-------|-------|---------|--------|
| stimulus                                      | 11.22  | 11.22   | 1     | 889   | 38.44   | 0.000  |
| group                                         | 0.90   | 0.45    | 2     | 125   | 1.54    | 0.218  |
| stimulus_salience                             | 0.17   | 0.17    | 1     | 889   | 0.57    | 0.449  |
| task_utility                                  | 0.31   | 0.31    | 1     | 889   | 1.08    | 0.300  |
| age                                           | 1.72   | 1.72    | 1     | 125   | 5.89    | 0.017  |
| gender                                        | 0.00   | 0.00    | 1     | 125   | 0.00    | 0.960  |
| stimulus:group                                | 0.96   | 0.48    | 2     | 889   | 1.65    | 0.193  |
| stimulus:stimulus_salience                    | 0.65   | 0.65    | 1     | 889   | 2.21    | 0.137  |
| group:stimulus_salience                       | 0.71   | 0.36    | 2     | 889   | 1.22    | 0.296  |
| stimulus:task_utility                         | 0.82   | 0.82    | 1     | 889   | 2.80    | 0.094  |
| group:task_utility                            | 0.17   | 0.09    | 2     | 889   | 0.29    | 0.745  |
| stimulus_salience:task_utility                | 0.93   | 0.93    | 1     | 889   | 3.17    | 0.075  |
| stimulus:group:stimulus_salience              | 0.45   | 0.23    | 2     | 889   | 0.78    | 0.459  |
| stimulus:group:task_utility                   | 0.52   | 0.26    | 2     | 889   | 0.89    | 0.411  |
| stimulus:stimulus_salience:task_utility       | 0.75   | 0.75    | 1     | 889   | 2.57    | 0.109  |
| group:stimulus_salience:task_utility          | 0.75   | 0.37    | 2     | 889   | 1.28    | 0.279  |
| stimulus:group:stimulus_salience:task_utility | 0.20   | 0.10    | 2     | 889   | 0.33    | 0.716  |

## Supplement 12: Main Model: MMN latency

|                                               | Sum Sq | Mean Sq | NumDF | DenDF | F value | Pr(>F) |
|-----------------------------------------------|--------|---------|-------|-------|---------|--------|
| stimulus                                      | 0.00   | 0.00    | 1     | 889   | 0.01    | 0.931  |
| group                                         | 0.13   | 0.07    | 2     | 125   | 0.12    | 0.888  |
| stimulus_salience                             | 8.29   | 8.29    | 1     | 889   | 14.79   | 0.000  |
| task_utility                                  | 0.04   | 0.04    | 1     | 889   | 0.07    | 0.786  |
| age                                           | 0.70   | 0.70    | 1     | 125   | 1.25    | 0.266  |
| gender                                        | 0.01   | 0.01    | 1     | 125   | 0.02    | 0.899  |
| stimulus:group                                | 0.23   | 0.11    | 2     | 889   | 0.20    | 0.815  |
| stimulus:stimulus_salience                    | 0.48   | 0.48    | 1     | 889   | 0.86    | 0.353  |
| group:stimulus_salience                       | 0.25   | 0.12    | 2     | 889   | 0.22    | 0.803  |
| stimulus:task_utility                         | 0.78   | 0.78    | 1     | 889   | 1.38    | 0.240  |
| group:task_utility                            | 1.66   | 0.83    | 2     | 889   | 1.48    | 0.228  |
| stimulus_salience:task_utility                | 4.93   | 4.93    | 1     | 889   | 8.78    | 0.003  |
| stimulus:group:stimulus_salience              | 0.10   | 0.05    | 2     | 889   | 0.09    | 0.913  |
| stimulus:group:task_utility                   | 1.08   | 0.54    | 2     | 889   | 0.96    | 0.383  |
| stimulus:stimulus_salience:task_utility       | 0.10   | 0.10    | 1     | 889   | 0.17    | 0.680  |
| group:stimulus_salience:task_utility          | 0.41   | 0.21    | 2     | 889   | 0.37    | 0.691  |
| stimulus:group:stimulus_salience:task_utility | 0.24   | 0.12    | 2     | 889   | 0.21    | 0.809  |

### Supplement 13: MMN difference wave amplitude

|                                      | Sum Sq | Mean Sq | NumDF | DenDF | F value | Pr(>F) |
|--------------------------------------|--------|---------|-------|-------|---------|--------|
| group                                | 1.96   | 0.98    | 2     | 125   | 1.08    | 0.344  |
| stimulus_salience                    | 3.59   | 3.59    | 1     | 381   | 3.95    | 0.047  |
| task_utility                         | 0.05   | 0.05    | 1     | 381   | 0.06    | 0.808  |
| age                                  | 3.50   | 3.50    | 1     | 125   | 3.85    | 0.052  |
| gender                               | 0.38   | 0.38    | 1     | 125   | 0.41    | 0.521  |
| group:stimulus_salience              | 3.47   | 1.73    | 2     | 381   | 1.91    | 0.150  |
| group:task_utility                   | 4.55   | 2.28    | 2     | 381   | 2.51    | 0.083  |
| stimulus_salience:task_utility       | 3.73   | 3.73    | 1     | 381   | 4.11    | 0.043  |
| group:stimulus_salience:task_utility | 1.83   | 0.91    | 2     | 381   | 1.01    | 0.366  |

### Supplement 14: MMN difference wave latency

|                                      | Sum Sq | Mean Sq | NumDF | DenDF | F value | Pr(>F) |
|--------------------------------------|--------|---------|-------|-------|---------|--------|
| group                                | 0.92   | 0.46    | 2     | 125   | 0.49    | 0.614  |
| stimulus_salience                    | 3.37   | 3.37    | 1     | 381   | 3.60    | 0.059  |
| task_utility                         | 2.98   | 2.98    | 1     | 381   | 3.18    | 0.075  |
| age                                  | 13.78  | 13.78   | 1     | 125   | 14.71   | 0.000  |
| gender                               | 2.44   | 2.44    | 1     | 125   | 2.60    | 0.109  |
| group:stimulus_salience              | 0.02   | 0.01    | 2     | 381   | 0.01    | 0.990  |
| group:task_utility                   | 0.21   | 0.11    | 2     | 381   | 0.11    | 0.894  |
| stimulus_salience:task_utility       | 0.01   | 0.01    | 1     | 381   | 0.01    | 0.910  |
| group:stimulus_salience:task_utility | 0.24   | 0.12    | 2     | 381   | 0.13    | 0.880  |

## Supplement 15: SEPR on RT

| Effect                                    | Sum Sq | Mean Sq | NumDF | DenDF | F value | Pr(>F) |
|-------------------------------------------|--------|---------|-------|-------|---------|--------|
| SEPR                                      | 6.18   | 6.18    | 1     | 540   | 24.70   | 0.000  |
| group                                     | 0.77   | 0.38    | 2     | 219   | 1.53    | 0.218  |
| stimulus_salience                         | 10.66  | 10.66   | 1     | 437   | 42.57   | 0.000  |
| task_utility                              | 24.15  | 24.15   | 1     | 412   | 96.46   | 0.000  |
| age                                       | 2.06   | 2.06    | 1     | 134   | 8.24    | 0.005  |
| gender                                    | 1.80   | 1.80    | 1     | 134   | 7.17    | 0.008  |
| SEPR:group                                | 0.24   | 0.12    | 2     | 537   | 0.48    | 0.618  |
| SEPR:stimulus_salience                    | 0.10   | 0.10    | 1     | 413   | 0.41    | 0.522  |
| group:stimulus_salience                   | 0.53   | 0.26    | 2     | 437   | 1.05    | 0.351  |
| SEPR:task_utility                         | 0.11   | 0.11    | 1     | 409   | 0.43    | 0.513  |
| group:task_utility                        | 0.33   | 0.16    | 2     | 413   | 0.66    | 0.518  |
| stimulus_salience:task_utility            | 0.27   | 0.27    | 1     | 405   | 1.07    | 0.302  |
| SEPR:group:stimulus_salience              | 0.06   | 0.03    | 2     | 413   | 0.13    | 0.880  |
| SEPR:group:task_utility                   | 0.07   | 0.04    | 2     | 409   | 0.14    | 0.869  |
| SEPR:stimulus_salience:task_utility       | 0.54   | 0.54    | 1     | 408   | 2.17    | 0.141  |
| group:stimulus_salience:task_utility      | 0.05   | 0.02    | 2     | 405   | 0.09    | 0.911  |
| SEPR:group:stimulus_salience:task_utility | 0.39   | 0.20    | 2     | 408   | 0.79    | 0.456  |

## Supplement 16: BPS on RT

| Effect                                   | Sum Sq | Mean Sq | NumDF | DenDF | F value | Pr(>F) |
|------------------------------------------|--------|---------|-------|-------|---------|--------|
| BPS                                      | 0.07   | 0.07    | 1     | 286   | 0.27    | 0.602  |
| group                                    | 1.50   | 0.75    | 2     | 131   | 2.79    | 0.065  |
| stimulus_salience                        | 32.02  | 32.02   | 1     | 500   | 119.35  | 0.000  |
| task_utility                             | 63.70  | 63.70   | 1     | 401   | 237.41  | 0.000  |
| age                                      | 2.68   | 2.68    | 1     | 133   | 9.99    | 0.002  |
| gender                                   | 1.55   | 1.55    | 1     | 130   | 5.79    | 0.018  |
| BPS:group                                | 0.68   | 0.34    | 2     | 274   | 1.27    | 0.283  |
| BPS:stimulus_salience                    | 0.00   | 0.00    | 1     | 410   | 0.01    | 0.929  |
| group:stimulus_salience                  | 0.71   | 0.36    | 2     | 498   | 1.33    | 0.265  |
| BPS:task_utility                         | 0.03   | 0.03    | 1     | 402   | 0.10    | 0.750  |
| group:task_utility                       | 0.73   | 0.36    | 2     | 401   | 1.36    | 0.258  |
| stimulus_salience:task_utility           | 0.00   | 0.00    | 1     | 401   | 0.00    | 0.965  |
| BPS:group:stimulus_salience              | 1.15   | 0.57    | 2     | 410   | 2.14    | 0.119  |
| BPS:group:task_utility                   | 0.28   | 0.14    | 2     | 402   | 0.52    | 0.597  |
| BPS:stimulus_salience:task_utility       | 0.11   | 0.11    | 1     | 402   | 0.42    | 0.516  |
| group:stimulus_salience:task_utility     | 0.24   | 0.12    | 2     | 401   | 0.45    | 0.636  |
| BPS:group:stimulus_salience:task_utility | 0.16   | 0.08    | 2     | 402   | 0.30    | 0.738  |

## Supplement 17: P3 amplitude on RT

| Effect                                            | Sum Sq | Mean Sq | NumDF | DenDF | F value | Pr(>F) |
|---------------------------------------------------|--------|---------|-------|-------|---------|--------|
| P3_amplitude                                      | 0.14   | 0.14    | 1     | 482   | 0.56    | 0.457  |
| group                                             | 1.38   | 0.69    | 2     | 129   | 2.81    | 0.064  |
| stimulus_salience                                 | 27.67  | 27.67   | 1     | 379   | 112.36  | 0.000  |
| task_utility                                      | 49.63  | 49.63   | 1     | 384   | 201.52  | 0.000  |
| age                                               | 1.59   | 1.59    | 1     | 123   | 6.46    | 0.012  |
| gender                                            | 1.72   | 1.72    | 1     | 123   | 6.99    | 0.009  |
| P3_amplitude:group                                | 0.78   | 0.39    | 2     | 479   | 1.58    | 0.206  |
| P3_amplitude:stimulus_salience                    | 0.49   | 0.49    | 1     | 380   | 2.01    | 0.157  |
| group:stimulus_salience                           | 0.18   | 0.09    | 2     | 379   | 0.36    | 0.697  |
| P3_amplitude:task_utility                         | 0.20   | 0.20    | 1     | 380   | 0.83    | 0.362  |
| group:task_utility                                | 1.06   | 0.53    | 2     | 384   | 2.16    | 0.117  |
| stimulus_salience:task_utility                    | 0.00   | 0.00    | 1     | 368   | 0.00    | 0.980  |
| P3_amplitude:group:stimulus_salience              | 1.87   | 0.94    | 2     | 380   | 3.80    | 0.023  |
| P3_amplitude:group:task_utility                   | 0.48   | 0.24    | 2     | 379   | 0.96    | 0.382  |
| P3_amplitude:stimulus_salience:task_utility       | 0.84   | 0.84    | 1     | 374   | 3.39    | 0.066  |
| group:stimulus_salience:task_utility              | 0.36   | 0.18    | 2     | 368   | 0.73    | 0.483  |
| P3_amplitude:group:stimulus_salience:task_utility | 0.91   | 0.45    | 2     | 373   | 1.84    | 0.160  |

## Supplement 18: P3 latency on RT

| Effect                                          | Sum Sq | Mean Sq | NumDF | DenDF | F value | Pr(>F) |
|-------------------------------------------------|--------|---------|-------|-------|---------|--------|
| P3_latency                                      | 0.02   | 0.02    | 1     | 459   | 0.09    | 0.768  |
| group                                           | 1.42   | 0.71    | 2     | 129   | 2.95    | 0.056  |
| stimulus_salience                               | 29.29  | 29.29   | 1     | 370   | 121.73  | 0.000  |
| task_utility                                    | 48.34  | 48.34   | 1     | 369   | 200.92  | 0.000  |
| age                                             | 1.77   | 1.77    | 1     | 123   | 7.35    | 0.008  |
| gender                                          | 1.62   | 1.62    | 1     | 123   | 6.72    | 0.011  |
| P3_latency:group                                | 1.41   | 0.71    | 2     | 458   | 2.93    | 0.054  |
| P3_latency:stimulus_salience                    | 0.25   | 0.25    | 1     | 380   | 1.06    | 0.305  |
| group:stimulus_salience                         | 0.25   | 0.13    | 2     | 370   | 0.53    | 0.590  |
| P3_latency:task_utility                         | 0.41   | 0.41    | 1     | 380   | 1.71    | 0.192  |
| group:task_utility                              | 2.06   | 1.03    | 2     | 369   | 4.28    | 0.015  |
| stimulus_salience:task_utility                  | 0.02   | 0.02    | 1     | 367   | 0.06    | 0.800  |
| P3_latency:group:stimulus_salience              | 0.56   | 0.28    | 2     | 380   | 1.17    | 0.312  |
| P3_latency:group:task_utility                   | 2.19   | 1.09    | 2     | 380   | 4.54    | 0.011  |
| P3_latency:stimulus_salience:task_utility       | 0.46   | 0.46    | 1     | 374   | 1.91    | 0.167  |
| group:stimulus_salience:task_utility            | 0.09   | 0.05    | 2     | 367   | 0.20    | 0.822  |
| P3_latency:group:stimulus_salience:task_utility | 0.39   | 0.20    | 2     | 374   | 0.82    | 0.443  |

## Supplement 19: MMN amplitude on RT

| Effect                                             | Sum Sq | Mean Sq | NumDF | DenDF | F value | Pr(>F) |
|----------------------------------------------------|--------|---------|-------|-------|---------|--------|
| mmn_amplitude                                      | 0.00   | 0.00    | 1     | 479   | 0.00    | 0.970  |
| group                                              | 1.33   | 0.67    | 2     | 123   | 2.66    | 0.074  |
| stimulus_salience                                  | 33.83  | 33.83   | 1     | 366   | 134.92  | 0.000  |
| task_utility                                       | 59.02  | 59.02   | 1     | 365   | 235.42  | 0.000  |
| age                                                | 1.80   | 1.80    | 1     | 125   | 7.16    | 0.008  |
| gender                                             | 1.81   | 1.81    | 1     | 125   | 7.22    | 0.008  |
| mmn_amplitude:group                                | 0.22   | 0.11    | 2     | 479   | 0.44    | 0.642  |
| mmn_amplitude:stimulus_salience                    | 0.06   | 0.06    | 1     | 371   | 0.23    | 0.633  |
| group:stimulus_salience                            | 0.24   | 0.12    | 2     | 366   | 0.49    | 0.614  |
| mmn_amplitude:task_utility                         | 0.57   | 0.57    | 1     | 377   | 2.29    | 0.131  |
| group:task_utility                                 | 1.57   | 0.78    | 2     | 365   | 3.13    | 0.045  |
| stimulus_salience:task_utility                     | 0.00   | 0.00    | 1     | 365   | 0.01    | 0.933  |
| mmn_amplitude:group:stimulus_salience              | 1.55   | 0.77    | 2     | 371   | 3.09    | 0.047  |
| mmn_amplitude:group:task_utility                   | 0.57   | 0.29    | 2     | 376   | 1.14    | 0.322  |
| mmn_amplitude:stimulus_salience:task_utility       | 0.00   | 0.00    | 1     | 374   | 0.02    | 0.902  |
| group:stimulus_salience:task_utility               | 0.35   | 0.17    | 2     | 365   | 0.69    | 0.503  |
| mmn_amplitude:group:stimulus_salience:task_utility | 0.14   | 0.07    | 2     | 374   | 0.27    | 0.760  |

## Supplement 20: MMN latency on RT

| Effect                                           | Sum Sq | Mean Sq | NumDF | DenDF | F value | Pr(>F) |
|--------------------------------------------------|--------|---------|-------|-------|---------|--------|
| mmn_latency                                      | 0.00   | 0.00    | 1     | 434   | 0.01    | 0.940  |
| group                                            | 1.34   | 0.67    | 2     | 122   | 2.68    | 0.073  |
| stimulus_salience                                | 34.06  | 34.06   | 1     | 365   | 136.06  | 0.000  |
| task_utility                                     | 63.50  | 63.50   | 1     | 364   | 253.67  | 0.000  |
| age                                              | 1.90   | 1.90    | 1     | 123   | 7.61    | 0.007  |
| gender                                           | 1.65   | 1.65    | 1     | 122   | 6.57    | 0.012  |
| mmn_latency:group                                | 0.00   | 0.00    | 2     | 433   | 0.00    | 0.997  |
| mmn_latency:stimulus_salience                    | 0.89   | 0.89    | 1     | 378   | 3.58    | 0.059  |
| group:stimulus_salience                          | 0.09   | 0.05    | 2     | 365   | 0.19    | 0.830  |
| mmn_latency:task_utility                         | 0.11   | 0.11    | 1     | 381   | 0.44    | 0.509  |
| group:task_utility                               | 1.14   | 0.57    | 2     | 364   | 2.28    | 0.104  |
| stimulus_salience:task_utility                   | 0.00   | 0.00    | 1     | 364   | 0.00    | 0.964  |
| mmn_latency:group:stimulus_salience              | 0.26   | 0.13    | 2     | 378   | 0.52    | 0.593  |
| mmn_latency:group:task_utility                   | 0.75   | 0.37    | 2     | 381   | 1.49    | 0.226  |
| mmn_latency:stimulus_salience:task_utility       | 0.43   | 0.43    | 1     | 379   | 1.72    | 0.191  |
| group:stimulus_salience:task_utility             | 0.27   | 0.13    | 2     | 364   | 0.54    | 0.586  |
| mmn_latency:group:stimulus_salience:task_utility | 0.24   | 0.12    | 2     | 379   | 0.48    | 0.620  |

## Supplement 21: Manipulations on RT

|                                      | Sum Sq | Mean Sq | NumDF | DenDF | F value | Pr(>F) |
|--------------------------------------|--------|---------|-------|-------|---------|--------|
| group                                | 1.26   | 0.63    | 2     | 136   | 2.38    | 0.096  |
| stimulus_salience                    | 42.96  | 42.96   | 1     | 415   | 162.11  | 0.000  |
| task_utility                         | 67.26  | 67.26   | 1     | 415   | 253.80  | 0.000  |
| age                                  | 2.54   | 2.54    | 1     | 136   | 9.59    | 0.002  |
| gender                               | 1.49   | 1.49    | 1     | 136   | 5.60    | 0.019  |
| group:stimulus_salience              | 0.70   | 0.35    | 2     | 415   | 1.33    | 0.266  |
| group:task_utility                   | 0.86   | 0.43    | 2     | 415   | 1.62    | 0.199  |
| stimulus_salience:task_utility       | 0.00   | 0.00    | 1     | 415   | 0.00    | 0.948  |
| group:stimulus_salience:task_utility | 0.18   | 0.09    | 2     | 415   | 0.34    | 0.715  |

## Main Models on Trial Level

### Supplement 22: Main Model: SEPR

|                                               | Sum Sq   | Mean Sq  | NumDF | DenDF | F value  | Pr(>F) |
|-----------------------------------------------|----------|----------|-------|-------|----------|--------|
| stimulus                                      | 15627.63 | 15627.63 | 1     | 73647 | 21542.69 | 0.000  |
| group                                         | 6.00     | 3.00     | 2     | 142   | 4.13     | 0.018  |
| stimulus_salience                             | 166.24   | 166.24   | 1     | 73650 | 229.16   | 0.000  |
| task_utility                                  | 37.50    | 37.50    | 1     | 73647 | 51.70    | 0.000  |
| age                                           | 0.09     | 0.09     | 1     | 139   | 0.13     | 0.723  |
| gender                                        | 0.00     | 0.00     | 1     | 138   | 0.00     | 0.959  |
| stimulus:group                                | 167.35   | 83.67    | 2     | 73647 | 115.34   | 0.000  |
| stimulus:stimulus_salience                    | 448.81   | 448.81   | 1     | 73644 | 618.69   | 0.000  |
| group:stimulus_salience                       | 6.93     | 3.46     | 2     | 73650 | 4.77     | 0.008  |
| stimulus:task_utility                         | 103.92   | 103.92   | 1     | 73642 | 143.25   | 0.000  |
| group:task_utility                            | 10.48    | 5.24     | 2     | 73647 | 7.22     | 0.001  |
| stimulus_salience:task_utility                | 0.11     | 0.11     | 1     | 73648 | 0.15     | 0.697  |
| stimulus:group:stimulus_salience              | 11.96    | 5.98     | 2     | 73644 | 8.24     | 0.000  |
| stimulus:group:task_utility                   | 16.68    | 8.34     | 2     | 73642 | 11.50    | 0.000  |
| stimulus:stimulus_salience:task_utility       | 0.46     | 0.46     | 1     | 73642 | 0.63     | 0.427  |
| group:stimulus_salience:task_utility          | 0.08     | 0.04     | 2     | 73648 | 0.05     | 0.949  |
| stimulus:group:stimulus_salience:task_utility | 0.46     | 0.23     | 2     | 73642 | 0.32     | 0.729  |

### Supplement 23: Main Model: BPS

|                                               | Sum Sq  | Mean Sq | NumDF | DenDF | F value | Pr(>F) |
|-----------------------------------------------|---------|---------|-------|-------|---------|--------|
| stimulus                                      | 36.41   | 36.41   | 1     | 83663 | 150.73  | 0.000  |
| group                                         | 0.49    | 0.25    | 2     | 138   | 1.02    | 0.363  |
| stimulus_salience                             | 1819.59 | 1819.59 | 1     | 83663 | 7531.97 | 0.000  |
| task_utility                                  | 1.69    | 1.69    | 1     | 83663 | 7.00    | 0.008  |
| age                                           | 2.39    | 2.39    | 1     | 138   | 9.91    | 0.002  |
| gender                                        | 0.51    | 0.51    | 1     | 138   | 2.10    | 0.149  |
| stimulus:group                                | 0.19    | 0.09    | 2     | 83663 | 0.38    | 0.681  |
| stimulus:stimulus_salience                    | 7.96    | 7.96    | 1     | 83663 | 32.95   | 0.000  |
| group:stimulus_salience                       | 62.46   | 31.23   | 2     | 83663 | 129.27  | 0.000  |
| stimulus:task_utility                         | 0.07    | 0.07    | 1     | 83663 | 0.30    | 0.587  |
| group:task_utility                            | 10.32   | 5.16    | 2     | 83663 | 21.37   | 0.000  |
| stimulus_salience:task_utility                | 4.80    | 4.80    | 1     | 83663 | 19.85   | 0.000  |
| stimulus:group:stimulus_salience              | 1.86    | 0.93    | 2     | 83663 | 3.85    | 0.021  |
| stimulus:group:task_utility                   | 0.12    | 0.06    | 2     | 83663 | 0.26    | 0.773  |
| stimulus:stimulus_salience:task_utility       | 0.08    | 0.08    | 1     | 83663 | 0.32    | 0.573  |
| group:stimulus_salience:task_utility          | 9.84    | 4.92    | 2     | 83663 | 20.37   | 0.000  |
| stimulus:group:stimulus_salience:task_utility | 0.15    | 0.08    | 2     | 83663 | 0.32    | 0.730  |

### Supplement 24: Main Model: P3 amplitude

|                                               | Sum Sq | Mean Sq | NumDF | DenDF | F value | Pr(>F) |
|-----------------------------------------------|--------|---------|-------|-------|---------|--------|
| stimulus                                      | 595.58 | 595.58  | 1     | 63582 | 762.63  | 0.000  |
| group                                         | 4.86   | 2.43    | 2     | 125   | 3.11    | 0.048  |
| stimulus_salience                             | 73.10  | 73.10   | 1     | 63584 | 93.61   | 0.000  |
| task_utility                                  | 80.62  | 80.62   | 1     | 63583 | 103.23  | 0.000  |
| age                                           | 6.39   | 6.39    | 1     | 124   | 8.19    | 0.005  |
| gender                                        | 0.60   | 0.60    | 1     | 124   | 0.77    | 0.382  |
| stimulus:group                                | 12.47  | 6.24    | 2     | 63582 | 7.98    | 0.000  |
| stimulus:stimulus_salience                    | 26.02  | 26.02   | 1     | 63582 | 33.31   | 0.000  |
| group:stimulus_salience                       | 2.71   | 1.35    | 2     | 63584 | 1.73    | 0.176  |
| stimulus:task_utility                         | 48.69  | 48.69   | 1     | 63581 | 62.34   | 0.000  |
| group:task_utility                            | 5.32   | 2.66    | 2     | 63583 | 3.40    | 0.033  |
| stimulus_salience:task_utility                | 2.87   | 2.87    | 1     | 63583 | 3.68    | 0.055  |
| stimulus:group:stimulus_salience              | 0.47   | 0.23    | 2     | 63582 | 0.30    | 0.742  |
| stimulus:group:task_utility                   | 7.92   | 3.96    | 2     | 63581 | 5.07    | 0.006  |
| stimulus:stimulus_salience:task_utility       | 0.97   | 0.97    | 1     | 63581 | 1.24    | 0.266  |
| group:stimulus_salience:task_utility          | 6.12   | 3.06    | 2     | 63583 | 3.92    | 0.020  |
| stimulus:group:stimulus_salience:task_utility | 7.10   | 3.55    | 2     | 63581 | 4.55    | 0.011  |

## Supplement 25: Main Model: P3 latency

|                                               | Sum Sq | Mean Sq | NumDF | DenDF | F value | Pr(>F) |
|-----------------------------------------------|--------|---------|-------|-------|---------|--------|
| stimulus                                      | 458.24 | 458.24  | 1     | 63587 | 491.17  | 0.000  |
| group                                         | 5.37   | 2.68    | 2     | 128   | 2.88    | 0.060  |
| stimulus_salience                             | 52.84  | 52.84   | 1     | 63595 | 56.64   | 0.000  |
| task_utility                                  | 4.50   | 4.50    | 1     | 63590 | 4.82    | 0.028  |
| age                                           | 0.59   | 0.59    | 1     | 124   | 0.64    | 0.427  |
| gender                                        | 2.95   | 2.95    | 1     | 124   | 3.16    | 0.078  |
| stimulus:group                                | 27.24  | 13.62   | 2     | 63586 | 14.60   | 0.000  |
| stimulus:stimulus_salience                    | 0.70   | 0.70    | 1     | 63584 | 0.75    | 0.388  |
| group:stimulus_salience                       | 2.89   | 1.45    | 2     | 63595 | 1.55    | 0.212  |
| stimulus:task_utility                         | 51.81  | 51.81   | 1     | 63583 | 55.54   | 0.000  |
| group:task_utility                            | 4.18   | 2.09    | 2     | 63591 | 2.24    | 0.106  |
| stimulus_salience:task_utility                | 3.49   | 3.49    | 1     | 63589 | 3.74    | 0.053  |
| stimulus:group:stimulus_salience              | 1.56   | 0.78    | 2     | 63584 | 0.84    | 0.434  |
| stimulus:group:task_utility                   | 3.22   | 1.61    | 2     | 63583 | 1.73    | 0.178  |
| stimulus:stimulus_salience:task_utility       | 4.38   | 4.38    | 1     | 63583 | 4.69    | 0.030  |
| group:stimulus_salience:task_utility          | 0.61   | 0.30    | 2     | 63589 | 0.33    | 0.722  |
| stimulus:group:stimulus_salience:task_utility | 1.13   | 0.57    | 2     | 63583 | 0.61    | 0.545  |

## Supplement 26: SEPR on RT

| Effect                                    | Sum Sq | Mean Sq | NumDF | DenDF | F value | Pr(>F) |
|-------------------------------------------|--------|---------|-------|-------|---------|--------|
| SEPR                                      | 57.40  | 57.40   | 1     | 12566 | 83.84   | 0.000  |
| group                                     | 2.51   | 1.25    | 2     | 147   | 1.83    | 0.164  |
| stimulus_salience                         | 95.83  | 95.83   | 1     | 12464 | 139.98  | 0.000  |
| task_utility                              | 327.86 | 327.86  | 1     | 12448 | 478.91  | 0.000  |
| age                                       | 6.72   | 6.72    | 1     | 133   | 9.82    | 0.002  |
| gender                                    | 4.58   | 4.58    | 1     | 132   | 6.70    | 0.011  |
| SEPR:group                                | 1.62   | 0.81    | 2     | 12563 | 1.18    | 0.307  |
| SEPR:stimulus_salience                    | 4.06   | 4.06    | 1     | 12460 | 5.93    | 0.015  |
| group:stimulus_salience                   | 2.16   | 1.08    | 2     | 12465 | 1.57    | 0.207  |
| SEPR:task_utility                         | 7.71   | 7.71    | 1     | 12450 | 11.27   | 0.001  |
| group:task_utility                        | 5.64   | 2.82    | 2     | 12449 | 4.12    | 0.016  |
| stimulus_salience:task_utility            | 2.05   | 2.05    | 1     | 12443 | 2.99    | 0.084  |
| SEPR:group:stimulus_salience              | 1.06   | 0.53    | 2     | 12459 | 0.78    | 0.460  |
| SEPR:group:task_utility                   | 1.22   | 0.61    | 2     | 12450 | 0.89    | 0.411  |
| SEPR:stimulus_salience:task_utility       | 5.98   | 5.98    | 1     | 12446 | 8.74    | 0.003  |
| group:stimulus_salience:task_utility      | 3.75   | 1.88    | 2     | 12443 | 2.74    | 0.065  |
| SEPR:group:stimulus_salience:task_utility | 1.27   | 0.63    | 2     | 12446 | 0.93    | 0.396  |

## Supplement 27: BPS on RT

| Effect                                   | Sum Sq | Mean Sq | NumDF | DenDF | F value | Pr(>F) |
|------------------------------------------|--------|---------|-------|-------|---------|--------|
| BPS                                      | 0.06   | 0.06    | 1     | 9400  | 0.09    | 0.767  |
| group                                    | 3.00   | 1.50    | 2     | 133   | 2.15    | 0.121  |
| stimulus_salience                        | 393.75 | 393.75  | 1     | 14273 | 563.94  | 0.000  |
| task_utility                             | 718.29 | 718.29  | 1     | 14145 | 1028.77 | 0.000  |
| age                                      | 7.09   | 7.09    | 1     | 133   | 10.15   | 0.002  |
| gender                                   | 3.93   | 3.93    | 1     | 132   | 5.62    | 0.019  |
| BPS:group                                | 4.45   | 2.23    | 2     | 8961  | 3.19    | 0.041  |
| BPS:stimulus_salience                    | 0.21   | 0.21    | 1     | 14161 | 0.30    | 0.581  |
| group:stimulus_salience                  | 2.07   | 1.03    | 2     | 14264 | 1.48    | 0.228  |
| BPS:task_utility                         | 0.00   | 0.00    | 1     | 14149 | 0.00    | 0.953  |
| group:task_utility                       | 9.18   | 4.59    | 2     | 14145 | 6.57    | 0.001  |
| stimulus_salience:task_utility           | 0.78   | 0.78    | 1     | 14141 | 1.12    | 0.291  |
| BPS:group:stimulus_salience              | 8.37   | 4.19    | 2     | 14160 | 6.00    | 0.002  |
| BPS:group:task_utility                   | 1.96   | 0.98    | 2     | 14148 | 1.40    | 0.246  |
| BPS:stimulus_salience:task_utility       | 0.29   | 0.29    | 1     | 14145 | 0.41    | 0.521  |
| group:stimulus_salience:task_utility     | 6.01   | 3.01    | 2     | 14141 | 4.31    | 0.013  |
| BPS:group:stimulus_salience:task_utility | 0.21   | 0.11    | 2     | 14145 | 0.15    | 0.860  |

## Supplement 28: P3 amplitude on RT

|                                                     | Sum Sq | Mean Sq | NumDF | DenDF | F value | Pr(>F) |
|-----------------------------------------------------|--------|---------|-------|-------|---------|--------|
| z_P3_amplitude                                      | 346.35 | 346.35  | 1     | 10831 | 523.42  | 0.000  |
| group                                               | 2.56   | 1.28    | 2     | 120   | 1.93    | 0.150  |
| stimulus_salience                                   | 260.19 | 260.19  | 1     | 10725 | 393.20  | 0.000  |
| task_utility                                        | 492.80 | 492.80  | 1     | 10721 | 744.73  | 0.000  |
| age                                                 | 7.76   | 7.76    | 1     | 120   | 11.73   | 0.001  |
| gender                                              | 3.91   | 3.91    | 1     | 119   | 5.91    | 0.017  |
| z_P3_amplitude:group                                | 2.28   | 1.14    | 2     | 10826 | 1.72    | 0.178  |
| z_P3_amplitude:stimulus_salience                    | 1.22   | 1.22    | 1     | 10723 | 1.84    | 0.175  |
| group:stimulus_salience                             | 1.05   | 0.52    | 2     | 10724 | 0.79    | 0.453  |
| z_P3_amplitude:task_utility                         | 0.27   | 0.27    | 1     | 10717 | 0.41    | 0.522  |
| group:task_utility                                  | 10.37  | 5.19    | 2     | 10721 | 7.84    | 0.000  |
| stimulus_salience:task_utility                      | 0.03   | 0.03    | 1     | 10716 | 0.05    | 0.819  |
| z_P3_amplitude:group:stimulus_salience              | 4.65   | 2.33    | 2     | 10723 | 3.52    | 0.030  |
| z_P3_amplitude:group:task_utility                   | 2.97   | 1.49    | 2     | 10717 | 2.25    | 0.106  |
| z_P3_amplitude:stimulus_salience:task_utility       | 3.25   | 3.25    | 1     | 10715 | 4.91    | 0.027  |
| group:stimulus_salience:task_utility                | 6.23   | 3.11    | 2     | 10716 | 4.70    | 0.009  |
| z_P3_amplitude:group:stimulus_salience:task_utility | 2.20   | 1.10    | 2     | 10715 | 1.66    | 0.190  |

## Supplement 29: P3 latency on RT

|                                                   | Sum Sq | Mean Sq | NumDF | DenDF | F value | Pr(>F) |
|---------------------------------------------------|--------|---------|-------|-------|---------|--------|
| z_P3_latency                                      | 64.28  | 64.28   | 1     | 10770 | 92.97   | 0.000  |
| group                                             | 3.40   | 1.70    | 2     | 120   | 2.46    | 0.090  |
| stimulus_salience                                 | 308.45 | 308.45  | 1     | 10722 | 446.13  | 0.000  |
| task_utility                                      | 550.97 | 550.97  | 1     | 10722 | 796.90  | 0.000  |
| age                                               | 5.01   | 5.01    | 1     | 120   | 7.25    | 0.008  |
| gender                                            | 5.13   | 5.13    | 1     | 119   | 7.42    | 0.007  |
| z_P3_latency:group                                | 0.64   | 0.32    | 2     | 10770 | 0.46    | 0.632  |
| z_P3_latency:stimulus_salience                    | 4.03   | 4.03    | 1     | 10722 | 5.84    | 0.016  |
| group:stimulus_salience                           | 0.55   | 0.27    | 2     | 10722 | 0.40    | 0.672  |
| z_P3_latency:task_utility                         | 0.57   | 0.57    | 1     | 10721 | 0.82    | 0.366  |
| group:task_utility                                | 7.43   | 3.72    | 2     | 10722 | 5.37    | 0.005  |
| stimulus_salience:task_utility                    | 0.41   | 0.41    | 1     | 10716 | 0.59    | 0.441  |
| z_P3_latency:group:stimulus_salience              | 0.03   | 0.01    | 2     | 10722 | 0.02    | 0.980  |
| z_P3_latency:group:task_utility                   | 0.13   | 0.06    | 2     | 10721 | 0.09    | 0.913  |
| z_P3_latency:stimulus_salience:task_utility       | 0.02   | 0.02    | 1     | 10716 | 0.03    | 0.873  |
| group:stimulus_salience:task_utility              | 6.88   | 3.44    | 2     | 10715 | 4.98    | 0.007  |
| z_P3_latency:group:stimulus_salience:task_utility | 1.79   | 0.89    | 2     | 10716 | 1.29    | 0.275  |

## Supplement 30: Manipulations on RT

|                                      | Sum Sq | Mean Sq | NumDF | DenDF | F value | Pr(>F) |
|--------------------------------------|--------|---------|-------|-------|---------|--------|
| group                                | 2.91   | 1.46    | 2     | 134   | 2.07    | 0.131  |
| stimulus_salience                    | 468.87 | 468.87  | 1     | 14309 | 665.57  | 0.000  |
| task_utility                         | 755.08 | 755.08  | 1     | 14311 | 1071.86 | 0.000  |
| age                                  | 7.14   | 7.14    | 1     | 133   | 10.13   | 0.002  |
| gender                               | 3.67   | 3.67    | 1     | 133   | 5.20    | 0.024  |
| group:stimulus_salience              | 7.12   | 3.56    | 2     | 14309 | 5.06    | 0.006  |
| group:task_utility                   | 9.30   | 4.65    | 2     | 14310 | 6.60    | 0.001  |
| stimulus_salience:task_utility       | 0.82   | 0.82    | 1     | 14305 | 1.17    | 0.280  |
| group:stimulus_salience:task_utility | 4.91   | 2.45    | 2     | 14305 | 3.48    | 0.031  |

### Supplement 31: Associations between pupillometric measures

| Effect                                            | Sum Sq   | Mean Sq  | NumDF | DenDF | F value  | Pr(>F) |
|---------------------------------------------------|----------|----------|-------|-------|----------|--------|
| BPS                                               | 5613.85  | 5613.85  | 1     | 71276 | 8897.69  | 0.000  |
| stimulus                                          | 13943.87 | 13943.87 | 1     | 73618 | 22100.38 | 0.000  |
| group                                             | 2.46     | 1.23     | 2     | 136   | 1.95     | 0.146  |
| stimulus_salience                                 | 1300.10  | 1300.10  | 1     | 73727 | 2060.60  | 0.000  |
| task_utility                                      | 33.74    | 33.74    | 1     | 73615 | 53.47    | 0.000  |
| age                                               | 6.64     | 6.64     | 1     | 136   | 10.53    | 0.001  |
| gender                                            | 1.34     | 1.34     | 1     | 135   | 2.13     | 0.147  |
| BPS:stimulus                                      | 22.69    | 22.69    | 1     | 73615 | 35.96    | 0.000  |
| BPS:group                                         | 65.67    | 32.83    | 2     | 70784 | 52.04    | 0.000  |
| stimulus:group                                    | 146.70   | 73.35    | 2     | 73618 | 116.25   | 0.000  |
| BPS:stimulus_salience                             | 10.67    | 10.67    | 1     | 73628 | 16.91    | 0.000  |
| stimulus:stimulus_salience                        | 361.79   | 361.79   | 1     | 73615 | 573.42   | 0.000  |
| group:stimulus_salience                           | 11.35    | 5.68     | 2     | 73727 | 9.00     | 0.000  |
| BPS:task_utility                                  | 0.90     | 0.90     | 1     | 73620 | 1.43     | 0.232  |
| stimulus:task_utility                             | 101.14   | 101.14   | 1     | 73614 | 160.29   | 0.000  |
| group:task_utility                                | 13.21    | 6.61     | 2     | 73615 | 10.47    | 0.000  |
| stimulus_salience:task_utility                    | 0.00     | 0.00     | 1     | 73617 | 0.00     | 0.993  |
| BPS:stimulus:group                                | 9.89     | 4.95     | 2     | 73615 | 7.84     | 0.000  |
| BPS:stimulus:stimulus_salience                    | 4.51     | 4.51     | 1     | 73614 | 7.15     | 0.007  |
| BPS:group:stimulus_salience                       | 2.86     | 1.43     | 2     | 73627 | 2.27     | 0.103  |
| stimulus:group:stimulus_salience                  | 11.56    | 5.78     | 2     | 73615 | 9.16     | 0.000  |
| BPS:stimulus:task_utility                         | 0.03     | 0.03     | 1     | 73614 | 0.04     | 0.842  |
| BPS:group:task_utility                            | 11.49    | 5.75     | 2     | 73620 | 9.11     | 0.000  |
| stimulus:group:task_utility                       | 22.22    | 11.11    | 2     | 73614 | 17.61    | 0.000  |
| BPS:stimulus_salience:task_utility                | 0.14     | 0.14     | 1     | 73620 | 0.22     | 0.637  |
| stimulus:stimulus_salience:task_utility           | 0.73     | 0.73     | 1     | 73614 | 1.16     | 0.282  |
| group:stimulus_salience:task_utility              | 7.79     | 3.89     | 2     | 73616 | 6.17     | 0.002  |
| BPS:stimulus:group:stimulus_salience              | 25.07    | 12.54    | 2     | 73614 | 19.87    | 0.000  |
| BPS:stimulus:group:task_utility                   | 8.27     | 4.14     | 2     | 73614 | 6.55     | 0.001  |
| BPS:stimulus:stimulus_salience:task_utility       | 1.70     | 1.70     | 1     | 73614 | 2.69     | 0.101  |
| BPS:group:stimulus_salience:task_utility          | 3.21     | 1.60     | 2     | 73620 | 2.54     | 0.079  |
| stimulus:group:stimulus_salience:task_utility     | 0.77     | 0.38     | 2     | 73614 | 0.61     | 0.545  |
| BPS:stimulus:group:stimulus_salience:task_utility | 4.11     | 2.06     | 2     | 73614 | 3.26     | 0.038  |

### Supplement 32: Associations between SEPR and P3 amplitude

| Effect                                             | Sum Sq | Mean Sq | NumDF | DenDF | F value | Pr(>F) |
|----------------------------------------------------|--------|---------|-------|-------|---------|--------|
| SEPR                                               | 8.34   | 8.34    | 1     | 55539 | 10.84   | 0.001  |
| stimulus                                           | 265.79 | 265.79  | 1     | 55509 | 345.39  | 0.000  |
| group                                              | 5.34   | 2.67    | 2     | 128   | 3.47    | 0.034  |
| stimulus_salience                                  | 11.94  | 11.94   | 1     | 55493 | 15.51   | 0.000  |
| task_utility                                       | 38.81  | 38.81   | 1     | 55489 | 50.43   | 0.000  |
| age                                                | 6.79   | 6.79    | 1     | 124   | 8.82    | 0.004  |
| gender                                             | 0.68   | 0.68    | 1     | 124   | 0.88    | 0.349  |
| SEPR:stimulus                                      | 50.77  | 50.77   | 1     | 55530 | 65.97   | 0.000  |
| SEPR:group                                         | 6.96   | 3.48    | 2     | 55538 | 4.52    | 0.011  |
| stimulus:group                                     | 8.38   | 4.19    | 2     | 55510 | 5.44    | 0.004  |
| SEPR:stimulus_salience                             | 9.56   | 9.56    | 1     | 55493 | 12.42   | 0.000  |
| stimulus:stimulus_salience                         | 0.43   | 0.43    | 1     | 55491 | 0.56    | 0.454  |
| group:stimulus_salience                            | 0.36   | 0.18    | 2     | 55493 | 0.24    | 0.789  |
| SEPR:task_utility                                  | 1.44   | 1.44    | 1     | 55490 | 1.87    | 0.171  |
| stimulus:task_utility                              | 27.48  | 27.48   | 1     | 55489 | 35.72   | 0.000  |
| group:task_utility                                 | 3.58   | 1.79    | 2     | 55489 | 2.33    | 0.098  |
| stimulus_salience:task_utility                     | 2.23   | 2.23    | 1     | 55490 | 2.90    | 0.089  |
| SEPR:stimulus:group                                | 0.76   | 0.38    | 2     | 55531 | 0.50    | 0.609  |
| SEPR:stimulus:stimulus_salience                    | 4.07   | 4.07    | 1     | 55492 | 5.29    | 0.021  |
| SEPR:group:stimulus_salience                       | 5.94   | 2.97    | 2     | 55493 | 3.86    | 0.021  |
| stimulus:group:stimulus_salience                   | 2.86   | 1.43    | 2     | 55491 | 1.86    | 0.156  |
| SEPR:stimulus:task_utility                         | 0.04   | 0.04    | 1     | 55491 | 0.05    | 0.831  |
| SEPR:group:task_utility                            | 0.53   | 0.26    | 2     | 55490 | 0.34    | 0.710  |
| stimulus:group:task_utility                        | 5.63   | 2.82    | 2     | 55489 | 3.66    | 0.026  |
| SEPR:stimulus_salience:task_utility                | 0.87   | 0.87    | 1     | 55490 | 1.13    | 0.288  |
| stimulus:stimulus_salience:task_utility            | 0.24   | 0.24    | 1     | 55488 | 0.31    | 0.579  |
| group:stimulus_salience:task_utility               | 4.34   | 2.17    | 2     | 55490 | 2.82    | 0.060  |
| SEPR:stimulus:group:stimulus_salience              | 3.17   | 1.58    | 2     | 55492 | 2.06    | 0.128  |
| SEPR:stimulus:group:task_utility                   | 0.01   | 0.00    | 2     | 55491 | 0.00    | 0.997  |
| SEPR:stimulus:stimulus_salience:task_utility       | 0.00   | 0.00    | 1     | 55490 | 0.01    | 0.937  |
| SEPR:group:stimulus_salience:task_utility          | 0.54   | 0.27    | 2     | 55490 | 0.35    | 0.704  |
| stimulus:group:stimulus_salience:task_utility      | 4.52   | 2.26    | 2     | 55488 | 2.94    | 0.053  |
| SEPR:stimulus:group:stimulus_salience:task_utility | 2.02   | 1.01    | 2     | 55490 | 1.31    | 0.269  |

## Miscellaneous

### Supplement 33: Power simulation

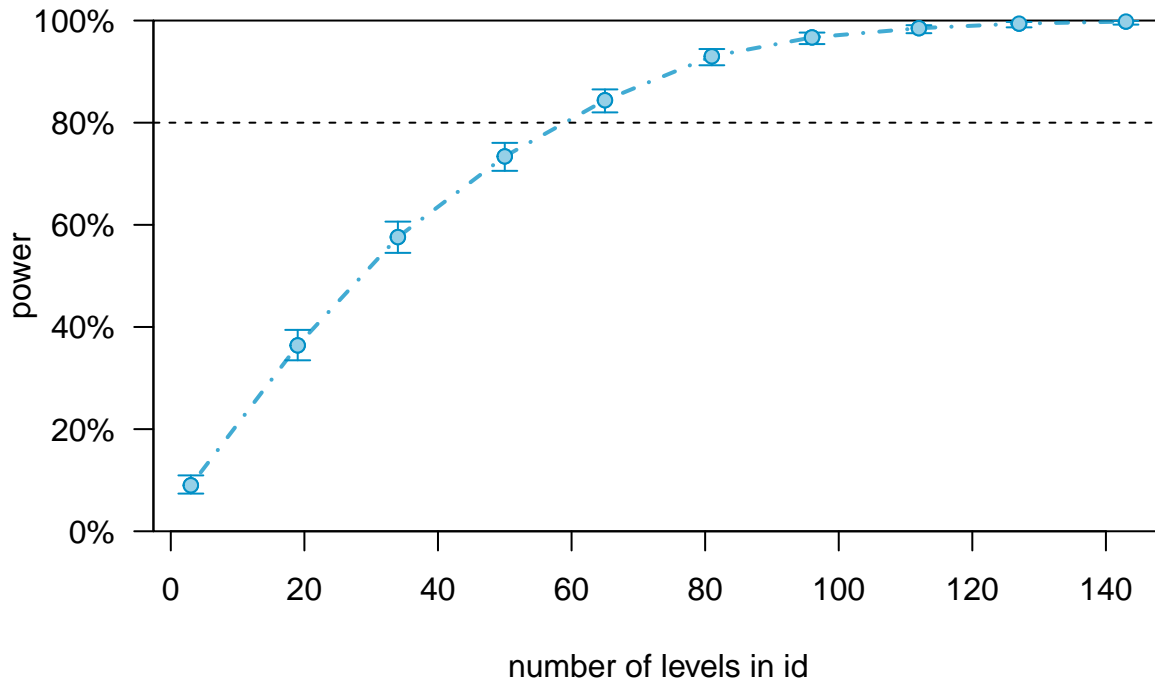

Power for model comparison, (95% confidence interval): 99.60% (98.98, 99.89)

Test: Likelihood ratio Comparison to  $y \sim \text{group} + \text{condition} + [\text{re}]$

Based on 1000 simulations, (0 warnings, 0 errors) alpha = 0.05, nrow = 63778

Time elapsed: 0 h 14 m 55 s

## Supplement 34: Data exclusion process

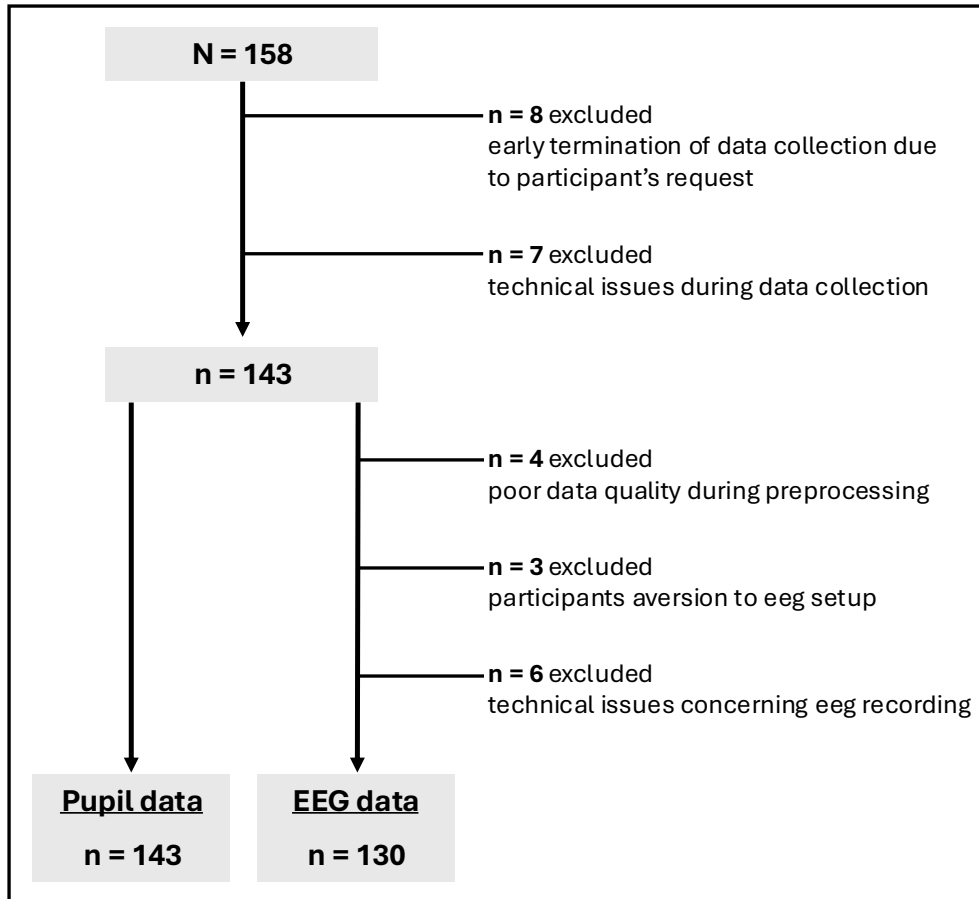

## Supplement 35: BPS defined as 50 ms

|                                               | Sum Sq | Mean Sq | NumDF | DenDF | F value | Pr(>F) |
|-----------------------------------------------|--------|---------|-------|-------|---------|--------|
| stimulus                                      | 1.22   | 1.22    | 1     | 980   | 20.04   | 0.000  |
| group                                         | 0.13   | 0.06    | 2     | 138   | 1.03    | 0.360  |
| stimulus_salience                             | 45.37  | 45.37   | 1     | 980   | 746.51  | 0.000  |
| task_utility                                  | 0.05   | 0.05    | 1     | 980   | 0.77    | 0.381  |
| age                                           | 0.60   | 0.60    | 1     | 138   | 9.90    | 0.002  |
| gender                                        | 0.13   | 0.13    | 1     | 138   | 2.08    | 0.152  |
| stimulus:group                                | 0.01   | 0.00    | 2     | 980   | 0.04    | 0.960  |
| stimulus:stimulus_salience                    | 0.27   | 0.27    | 1     | 980   | 4.42    | 0.036  |
| group:stimulus_salience                       | 1.52   | 0.76    | 2     | 980   | 12.53   | 0.000  |
| stimulus:task_utility                         | 0.00   | 0.00    | 1     | 980   | 0.02    | 0.881  |
| group:task_utility                            | 0.29   | 0.14    | 2     | 980   | 2.38    | 0.093  |
| stimulus_salience:task_utility                | 0.18   | 0.18    | 1     | 980   | 2.89    | 0.090  |
| stimulus:group:stimulus_salience              | 0.04   | 0.02    | 2     | 980   | 0.36    | 0.701  |
| stimulus:group:task_utility                   | 0.01   | 0.00    | 2     | 980   | 0.06    | 0.946  |
| stimulus:stimulus_salience:task_utility       | 0.00   | 0.00    | 1     | 980   | 0.03    | 0.870  |
| group:stimulus_salience:task_utility          | 0.24   | 0.12    | 2     | 980   | 2.00    | 0.136  |
| stimulus:group:stimulus_salience:task_utility | 0.00   | 0.00    | 2     | 980   | 0.03    | 0.970  |

### Supplement 36: BPS defined as 500 ms

|                                               | Sum Sq | Mean Sq | NumDF | DenDF | F value | Pr(>F) |
|-----------------------------------------------|--------|---------|-------|-------|---------|--------|
| stimulus                                      | 0.42   | 0.42    | 1     | 980   | 6.73    | 0.010  |
| group                                         | 0.13   | 0.07    | 2     | 138   | 1.06    | 0.349  |
| stimulus_salience                             | 48.57  | 48.57   | 1     | 980   | 781.65  | 0.000  |
| task_utility                                  | 0.01   | 0.01    | 1     | 980   | 0.17    | 0.685  |
| age                                           | 0.61   | 0.61    | 1     | 138   | 9.84    | 0.002  |
| gender                                        | 0.13   | 0.13    | 1     | 138   | 2.07    | 0.152  |
| stimulus:group                                | 0.00   | 0.00    | 2     | 980   | 0.04    | 0.962  |
| stimulus:stimulus_salience                    | 0.15   | 0.15    | 1     | 980   | 2.37    | 0.124  |
| group:stimulus_salience                       | 1.55   | 0.77    | 2     | 980   | 12.45   | 0.000  |
| stimulus:task_utility                         | 0.01   | 0.01    | 1     | 980   | 0.21    | 0.649  |
| group:task_utility                            | 0.25   | 0.12    | 2     | 980   | 1.98    | 0.138  |
| stimulus_salience:task_utility                | 0.14   | 0.14    | 1     | 980   | 2.21    | 0.138  |
| stimulus:group:stimulus_salience              | 0.05   | 0.03    | 2     | 980   | 0.42    | 0.658  |
| stimulus:group:task_utility                   | 0.00   | 0.00    | 2     | 980   | 0.02    | 0.984  |
| stimulus:stimulus_salience:task_utility       | 0.00   | 0.00    | 1     | 980   | 0.04    | 0.846  |
| group:stimulus_salience:task_utility          | 0.26   | 0.13    | 2     | 980   | 2.07    | 0.127  |
| stimulus:group:stimulus_salience:task_utility | 0.00   | 0.00    | 2     | 980   | 0.03    | 0.973  |

### Supplement 37: BPS-SEPR Model Fit

|               | number of parameters | AIC      | BIC      | log likelihood | deviance | Chi-squared | df | p-value |
|---------------|----------------------|----------|----------|----------------|----------|-------------|----|---------|
| linear_fit    | 52                   | 176288.6 | 176767.4 | -88092.28      | 176184.6 | NA          | NA | NA      |
| quadratic_fit | 76                   | 176081.1 | 176781.0 | -87964.53      | 175929.1 | 255.5088    | 24 | 0       |
| cubic_fit     | 100                  | 175890.5 | 176811.4 | -87845.27      | 175690.5 | 238.5232    | 24 | 0       |

### Supplement 38: Quadratic association between BPS and RT

| Effect                                            | Sum Sq | Mean Sq | NumDF | DenDF | F value | Pr(>F) |
|---------------------------------------------------|--------|---------|-------|-------|---------|--------|
| poly(BPS, 2)                                      | 0.56   | 0.28    | 2     | 11326 | 0.40    | 0.667  |
| group                                             | 3.23   | 1.62    | 2     | 137   | 2.32    | 0.102  |
| stimulus_salience                                 | 387.14 | 387.14  | 1     | 14299 | 556.43  | 0.000  |
| task_utility                                      | 702.71 | 702.71  | 1     | 14167 | 1010.01 | 0.000  |
| age                                               | 7.19   | 7.19    | 1     | 138   | 10.34   | 0.002  |
| gender                                            | 4.01   | 4.01    | 1     | 137   | 5.77    | 0.018  |
| poly(BPS, 2):group                                | 13.63  | 3.41    | 4     | 11035 | 4.90    | 0.001  |
| poly(BPS, 2):stimulus_salience                    | 0.15   | 0.07    | 2     | 14226 | 0.10    | 0.900  |
| group:stimulus_salience                           | 2.08   | 1.04    | 2     | 14287 | 1.50    | 0.224  |
| poly(BPS, 2):task_utility                         | 0.03   | 0.02    | 2     | 14171 | 0.02    | 0.978  |
| group:task_utility                                | 7.96   | 3.98    | 2     | 14167 | 5.72    | 0.003  |
| stimulus_salience:task_utility                    | 0.37   | 0.37    | 1     | 14160 | 0.53    | 0.467  |
| poly(BPS, 2):group:stimulus_salience              | 17.60  | 4.40    | 4     | 14224 | 6.32    | 0.000  |
| poly(BPS, 2):group:task_utility                   | 4.17   | 1.04    | 4     | 14170 | 1.50    | 0.200  |
| poly(BPS, 2):stimulus_salience:task_utility       | 0.38   | 0.19    | 2     | 14165 | 0.27    | 0.763  |
| group:stimulus_salience:task_utility              | 6.03   | 3.01    | 2     | 14160 | 4.33    | 0.013  |
| poly(BPS, 2):group:stimulus_salience:task_utility | 4.49   | 1.12    | 4     | 14165 | 1.61    | 0.168  |

### Supplement 39: MMN Topographies

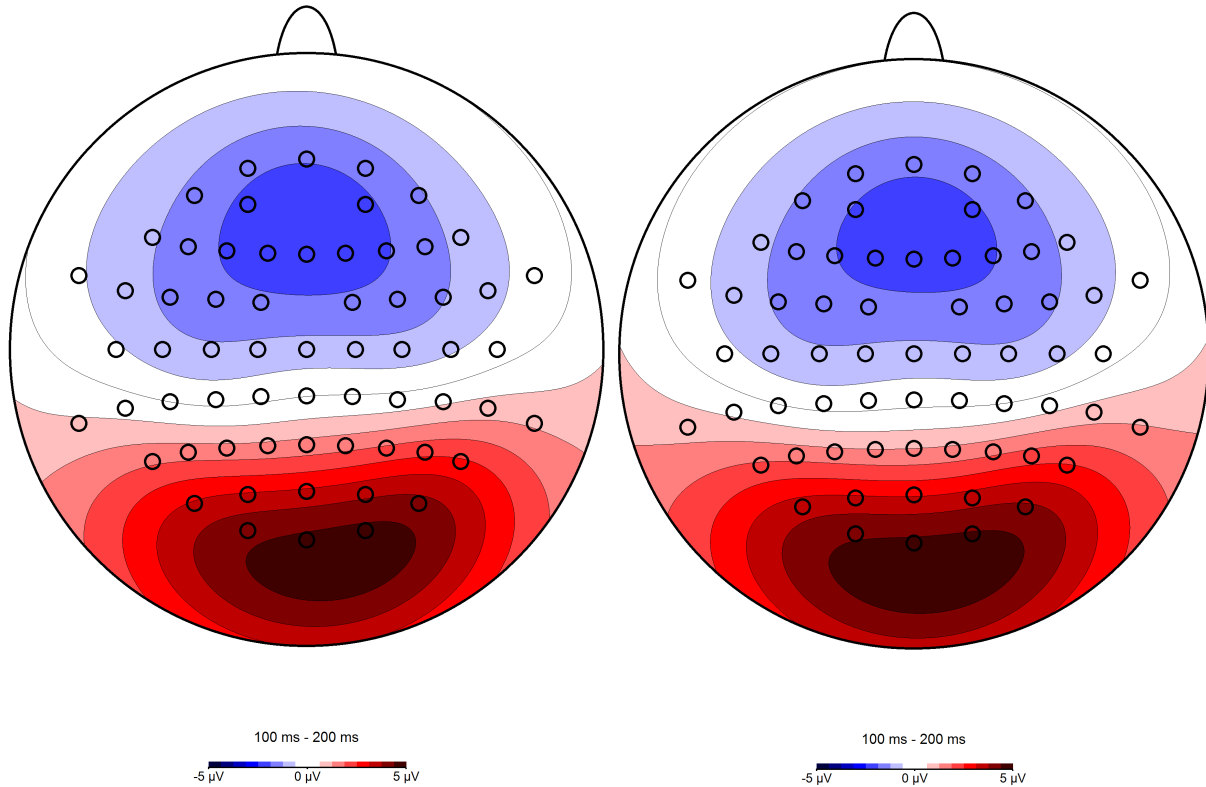

Supplement: Supplementary file 1 [file f624d4d2a185f7c839ec8334.pdf]
